# Supplementary material for: Correction: The Tumor Suppressor Gene, RASSF1A, Is Essential for Protection against Inflammation -Induced Injury
Source: PubMed Central journal article supplement (PMC4479583; doi:10.1371/journal.pone.0131150), 2015-06-24

**A**

PCNA Staining (Proliferation Marker)  
(3% DSS Day 9)

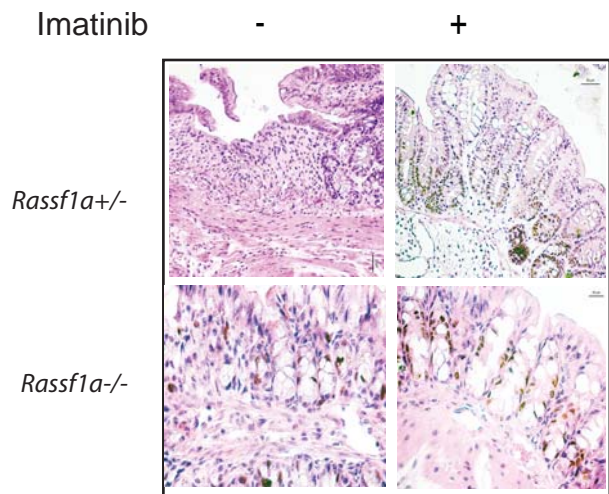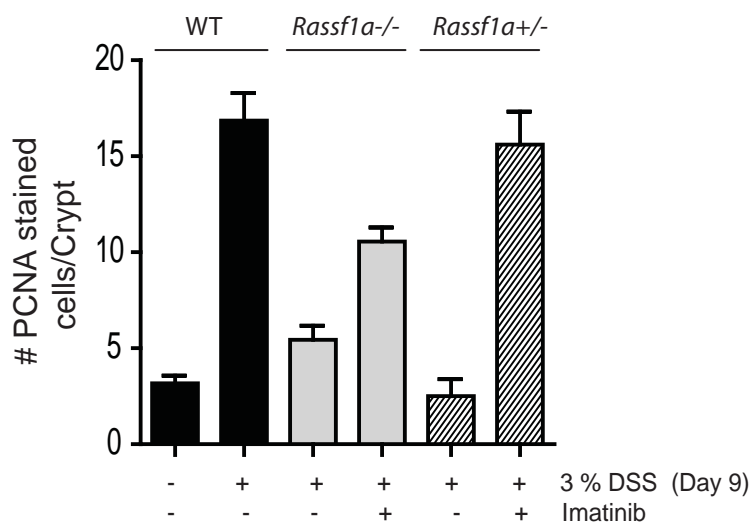

**B**

pY-YAP Expression in Colon Lysates, Day 9

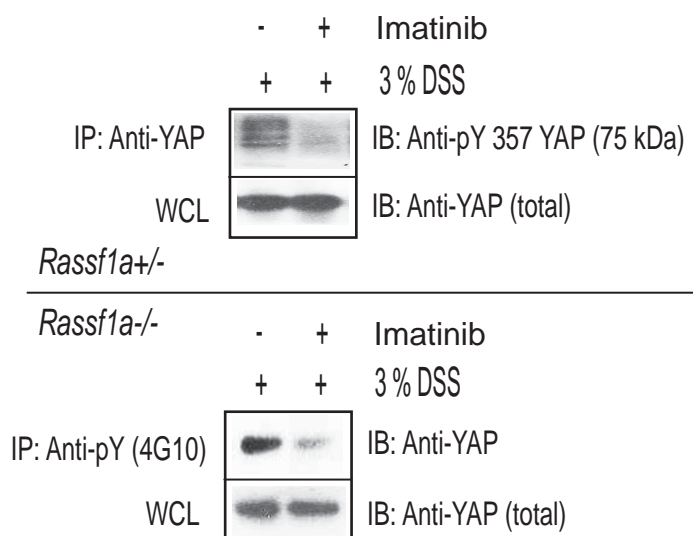

**C**

Immunohistochemistry with Y357 YAP (+ Imatinib)

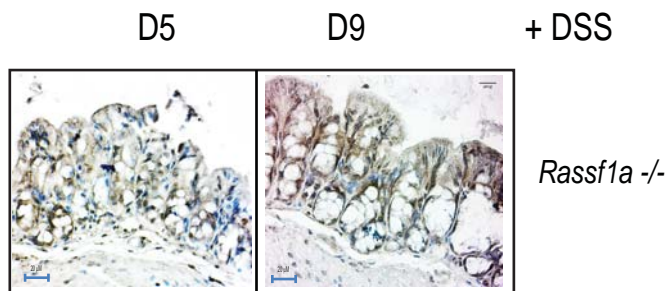

**D**

Commassie Blue - Samples used in Fig. 8F

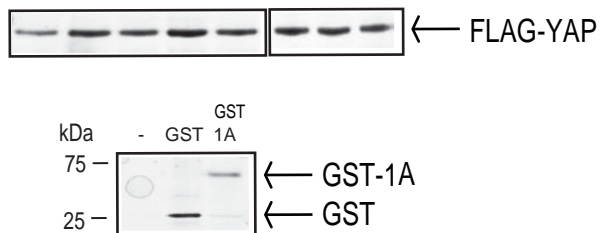

**E**

Stabilization of p53 (Colon lysates)

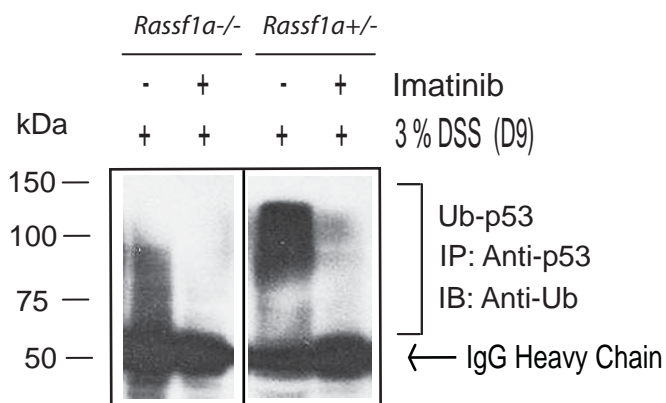

Supplement: pone.0131150.s002.pdf [file pone.0131150.s002.pdf]
